# Supplementary material for: Rad53 checkpoint kinase regulation of DNA replication fork rate via Mrc1 phosphorylation
Source: bioRxiv preprint, doi:10.1101/2021.04.09.439171, version 1 (2021-04-10)
Supplement: Supp Table S5 [file 439171_file02.xlsx]

## Sheet: Supplemental Table S5
Sequence	Modifications	Mass	Mass Fractional Part	Protein Groups	Proteins	Gene Names	Protein Names	Unique (Groups)	Unique (Proteins)	Acetyl (Protein N-term)	Oxidation (M)	Phospho (STY)	Missed cleavages	Identification type AM1_r1	Identification type AM1_r2	Identification type AM1_r3	Identification type AM2_r1	Identification type AM2_r2	Identification type AM2_r3	Fraction Average	Fraction Std. Dev.	Fraction 1	Fraction 3	Experiment AM1_r1	Experiment AM1_r2	Experiment AM1_r3	Experiment AM2_r1	Experiment AM2_r2	Experiment AM2_r3	Retention time	Calibrated retention time	Charges	PEP	MS/MS scan number	Raw file	Score	Delta score	Intensity	Intensity AM1_r1	Intensity AM1_r2	Intensity AM1_r3	Intensity AM2_r1	Intensity AM2_r2	Intensity AM2_r3	Reverse	Potential contaminant	id	Protein group IDs	Peptide ID
RVPLLSSYANNLK	Unmodified	1473.83	0.830362	31	P25588	MRC1	Mediator of replication checkpoint protein 1	yes	yes	0	0	0	1	By MS/MS	By MS/MS	By MS/MS	By MS/MS	By MS/MS	By MS/MS	3	1.59	6	7	2	2	2	2	3	2	31.586	31.588	2;3	1.2311e-37	5682	CSM8521_1_r2	291.24	224.94	445830000	23999000	54482000	210840000	37348000	39489000	26899000			349	31	298
EIQSELASEDSKR	Unmodified	1490.72	0.721266	31	P25588	MRC1	Mediator of replication checkpoint protein 1	yes	yes	0	0	0	1	By MS/MS	By MS/MS	By MS/MS	By MS/MS	By MS/MS	By MS/MS	2.74	1.6	15	13	5	4	6	5	4	4	23.695	23.709	2;3	1.4963e-37	3348	CSM8521_2_r2	282.39	266.51	14666000000	1296800000	1455100000	1867100000	2584500000	2369600000	1958600000			87	31	78
RLEIGDDAK	Unmodified	1015.53	0.529823	31	P25588	MRC1	Mediator of replication checkpoint protein 1	yes	yes	0	0	0	1	By MS/MS	By MS/MS	By MS/MS	By MS/MS	By MS/MS	By MS/MS	2.82	1.59	4	4	1	1	2	1	2	1	23.231	23.243	2	4.4981e-30	3478	CSM8521_1_r3	255.84	206.75	18312000000	1320600000	1403300000	2227400000	2206500000	2171500000	1689800000			343	31	293
SNNYEDFETDKELSR	Unmodified	1845.8	0.801701	31	P25588	MRC1	Mediator of replication checkpoint protein 1	yes	yes	0	0	0	1	By MS/MS	By MS/MS	By MS/MS	By MS/MS	By MS/MS	By MS/MS	2.56	1.57	12	9	4	4	4	4	3	2	27.656	27.615	2;3	1.7795e-27	4471	CSM8521_1_r1	248.41	240.63	9242000000	1699600000	1920200000	2600900000	1770900000	12062000	868350000			391	31	332
RPEDEDEVENGDTSLVGVFK	Unmodified	2234.03	0.0338855	31	P25588	MRC1	Mediator of replication checkpoint protein 1	yes	yes	0	0	0	1	By MS/MS	By MS/MS	By MS/MS	By MS/MS	By MS/MS	By MS/MS	2	1	6	6	1	2	3	2	2	2	33.356	33.341	2;3	9.9818e-61	6148	CSM8521_1_r2	247.32	239.19	513570000	2039500	67891000	217920000	77319000	92894000	55506000			345	31	295
SVELNLTDETR	Unmodified	1275.63	0.63066	31	P25588	MRC1	Mediator of replication checkpoint protein 1	yes	yes	0	0	0	0	By MS/MS	By MS/MS	By MS/MS	By MS/MS	By MS/MS	By MS/MS	2.81	1.22	5	13	1	2	2	4	5	4	30.866	30.831	2	1.7222e-24	5355	CSM8521_1_r2	237.61	171.18	12363000000	1832700000	1869600000	1729900000	2731500000	2523200000	1584900000			405	31	344
IREIQSELASEDSKR	Unmodified	1759.91	0.906441	31	P25588	MRC1	Mediator of replication checkpoint protein 1	yes	yes	0	0	0	2	By MS/MS	By MS/MS	By MS/MS	By MS/MS	By MS/MS	By MS/MS	2.38	1.64	7	3	2	2	3	1	1	1	24.643	24.645	2;3;4	3.0723e-23	3941	CSM8521_1_r3	235.73	212.12	185940000	3437700	16774000	129820000	6854800	6512600	5155500			199	31	169
IREIQSELASEDSK	Unmodified	1603.81	0.80533	31	P25588	MRC1	Mediator of replication checkpoint protein 1	yes	yes	0	0	0	1	By MS/MS	By MS/MS	By MS/MS	By MS/MS	By MS/MS	By MS/MS	3	1.63	6	6	2	2	2	2	2	2	25.877	25.895	2;3	4.1869e-22	4087	CSM8521_1_r2	234.92	226.7	220990000	18846000	25574000	47682000	40095000	24489000	18218000			198	31	168
IDSSGATSQTQPIK	Unmodified	1431.72	0.720537	31	P25588	MRC1	Mediator of replication checkpoint protein 1	yes	yes	0	0	0	0	By MS/MS	By MS/MS	By MS/MS	By MS/MS	By MS/MS	By MS/MS	3.08	1.68	8	7	3	3	2	3	2	2	23.415	23.43	2	2.2876e-34	3422	CSM8521_1_r3	227.94	192.65	20657000000	1678600000	1854000000	1951000000	3679300000	3204100000	1736800000			173	31	148
EIQSELASEDSKREK	Phospho (STY)	1827.83	0.825152	31	P25588	MRC1	Mediator of replication checkpoint protein 1	yes	yes	0	0	1	2	By MS/MS	By MS/MS		By MS/MS	By MS/MS	By MS/MS	3.62	1.44	2	5	1	1		2	2	1	22.945	22.978	2;3	3.8283e-35	3135	CSM8521_3_r2	227.47	196.25	3278600000	11282000	10018000	0	18731000	18097000	12236000			90	31	79
EIQSELASEDSKR	Phospho (STY)	1570.69	0.687596	31	P25588	MRC1	Mediator of replication checkpoint protein 1	yes	yes	0	0	1	1	By MS/MS	By MS/MS	By MS/MS	By MS/MS	By MS/MS	By MS/MS	3.38	1.7	6	5	2	2	2	2	1	2	25.363	25.367	2;3	9.9677e-30	3712	CSM8521_3_r3	222.94	195.07	393250000	8937300	7855700	11300000	38002000	14727000	19006000			88	31	78
VPLLSSYANNLK	Unmodified	1317.73	0.729251	31	P25588	MRC1	Mediator of replication checkpoint protein 1	yes	yes	0	0	0	0	By MS/MS	By MS/MS	By MS/MS	By MS/MS	By MS/MS	By MS/MS	3	1.63	3	3	1	1	1	1	1	1	34.344	34.296	2	4.6693e-22	6421	CSM8521_1_r2	220.51	206.69	1060500000	141430000	143680000	184950000	152470000	150790000	63512000			466	31	393
QNSSIKSFTNSQTDSTTSK	Phospho (STY)	2139.93	0.932136	31	P25588	MRC1	Mediator of replication checkpoint protein 1	yes	yes	0	0	1	1	By MS/MS	By MS/MS	By MS/MS	By MS/MS	By MS/MS	By MS/MS	2.2	0.98	4	6	1	2	1	2	2	2	25.244	25.254	2;3	7.0362e-44	3807	CSM8521_2_r2	214.28	192.97	631670000	4418700	12854000	14389000	177930000	298230000	123840000			327	31	280
NVSSSFTQTQR	Unmodified	1253.6	0.600028	31	P25588	MRC1	Mediator of replication checkpoint protein 1	yes	yes	0	0	0	0	By MS/MS	By MS/MS	By MS/MS	By MS/MS	By MS/MS	By MS/MS	2.64	1.3	7	12	2	3	2	4	4	4	23.726	23.745	2	7.7802e-17	3564	CSM8521_1_r2	211.45	196.77	8904500000	1387700000	1218700000	1432600000	1629700000	1815900000	1021100000			307	31	262
SNNYEDFETDKELSR	Phospho (STY)	1925.77	0.768031	31	P25588	MRC1	Mediator of replication checkpoint protein 1	yes	yes	0	0	1	1	By MS/MS	By MS/MS	By MS/MS	By MS/MS	By MS/MS	By MS/MS	3.55	1.5	6	12	2	2	2	4	5	3	28.979	28.928	2;3	4.6964e-23	4886	CSM8521_3_r1	202.25	189.63	3600700000	9167100	10695000	11262000	28347000	49659000	11540000			392	31	332
IPVSIQQDK	Unmodified	1026.57	0.57096	31	P25588	MRC1	Mediator of replication checkpoint protein 1	yes	yes	0	0	0	0	By MS/MS	By MS/MS	By MS/MS	By MS/MS	By MS/MS	By MS/MS	3	1.55	3	4	1	1	1	1	1	2	25.829	25.851	2	2.2472e-08	4039	CSM8521_3_r3	194.44	127.76	23714000000	1711900000	1829800000	2370600000	3923400000	3668000000	2484600000			194	31	166
KPQKPIPTK	Unmodified	1035.64	0.644065	31	P25588	MRC1	Mediator of replication checkpoint protein 1	yes	yes	0	0	0	2	By matching	By MS/MS	By MS/MS	By matching	By MS/MS	By MS/MS	2.6	1.5	6	6	2	2	2	2	2	2	19.537	19.503	2;3	8.3472e-06	2208	CSM8521_1_r3	193.1	106.27	666670000	3197700	94326000	527890000	7960600	9421500	8048400			216	31	185
VPLLSSYANNLKR	Unmodified	1473.83	0.830362	31	P25588	MRC1	Mediator of replication checkpoint protein 1	yes	yes	0	0	0	1		By matching	By MS/MS				1	0	2			1	1				30.953	30.906	2	1.1447e-11	5935	CSM8521_1_r3	191.85	175.96	11982000	0	1268200	10713000	0	0	0			468	31	394
SFTNSQTDSTTSK	Unmodified	1402.62	0.621217	31	P25588	MRC1	Mediator of replication checkpoint protein 1	yes	yes	0	0	0	0	By MS/MS	By MS/MS	By MS/MS	By MS/MS	By MS/MS	By MS/MS	3.46	1.6	3	4	1	1	1	2	1	1	21.241	21.267	2	3.6606e-16	2696	CSM8521_1_r2	188.28	176.78	7740000000	1161500000	1551400000	1301400000	659640000	851460000	512230000			364	31	310
RPEDEDEVENGDTSLVGVFK	Phospho (STY)	2314	0.000215897	31	P25588	MRC1	Mediator of replication checkpoint protein 1	yes	yes	0	0	1	1				By MS/MS	By MS/MS	By matching	4.33	0.943		3				1	1	1	35.315	35.359	2;3	2.2156e-39	6547	CSM8521_3_r1	187.44	169.77	119910000	0	0	0	2964100	3065500	1626900			346	31	295
SVELNLTDETR	Phospho (STY)	1355.6	0.59699	31	P25588	MRC1	Mediator of replication checkpoint protein 1	yes	yes	0	0	1	0	By MS/MS	By MS/MS	By MS/MS	By MS/MS	By MS/MS	By MS/MS	2.6	1.5	6	6	2	2	2	2	2	2	34.281	34.234	2	1.7532e-12	6407	CSM8521_2_r2	186.46	135.18	302420000	43958000	44845000	35639000	59356000	64487000	40944000			406	31	344
LSKDESVLPISQLSK	Phospho (STY)	1722.88	0.880482	31	P25588	MRC1	Mediator of replication checkpoint protein 1	yes	yes	0	0	1	1	By MS/MS	By MS/MS	By MS/MS	By MS/MS	By MS/MS	By MS/MS	2.09	0.996	5	6	1	2	2	2	2	2	33.615	33.583	2;3	2.8704e-19	6129	CSM8521_2_r1	182.7	156.58	149810000	20269000	42614000	24737000	24799000	24321000	13068000			252	31	217
SFTNSQTDSTTSK	Phospho (STY)	1482.59	0.587548	31	P25588	MRC1	Mediator of replication checkpoint protein 1	yes	yes	0	0	1	0	By MS/MS	By MS/MS	By MS/MS	By MS/MS	By MS/MS	By MS/MS	3	1.59	6	7	2	2	2	2	3	2	22.629	22.648	2	1.9851e-14	3063	CSM8521_1_r1	182.23	165.62	290650000	35274000	60419000	60265000	32188000	34371000	25078000			365	31	310
SEVKDNSYSEK	Phospho (STY)	1364.55	0.549705	31	P25588	MRC1	Mediator of replication checkpoint protein 1	yes	yes	0	0	1	1	By MS/MS	By MS/MS	By MS/MS	By MS/MS	By MS/MS	By MS/MS	3	1.63	3	3	1	1	1	1	1	1	20.184	20.147	2	5.9198e-09	2360	CSM8521_2_r1	181.4	164.86	141230000	12010000	9656400	9640900	25038000	13950000	21005000			360	31	307
LSKDESVLPISQLSK	Unmodified	1642.91	0.914152	31	P25588	MRC1	Mediator of replication checkpoint protein 1	yes	yes	0	0	0	1	By MS/MS	By MS/MS	By MS/MS	By MS/MS	By MS/MS	By MS/MS	1.71	0.958	9	5	3	3	3	1	2	2	31.442	31.406	2;3	1.1856e-18	6029	CSM8521_1_r3	174.89	158.8	3432900000	183700000	386650000	1951400000	235650000	416280000	259220000			251	31	217
TPLTTGR	Unmodified	744.413	0.413003	31	P25588	MRC1	Mediator of replication checkpoint protein 1	yes	yes	0	0	0	0	By matching	By MS/MS	By matching	By matching	By MS/MS	By MS/MS	2	1	3	3	1	1	1	1	1	1	21.501	21.506	2	0.0017103	2760	CSM8521_1_r2	174.64	138.05	2546300000	271710000	279410000	499050000	510200000	593770000	392140000			424	31	360
NVSSSFTQTQR	Phospho (STY)	1333.57	0.566359	31	P25588	MRC1	Mediator of replication checkpoint protein 1	yes	yes	0	0	1	0	By MS/MS	By MS/MS	By MS/MS	By MS/MS	By MS/MS	By MS/MS	3.4	1.6	6	8	2	2	2	3	2	3	26.329	26.35	2	2.3915e-09	4281	CSM8521_3_r2	170.52	160.21	4798900000	39577000	46923000	71716000	778020000	763150000	517650000			308	31	262
SEVKDNSYSEK	Unmodified	1284.58	0.583375	31	P25588	MRC1	Mediator of replication checkpoint protein 1	yes	yes	0	0	0	1	By MS/MS	By MS/MS	By MS/MS	By MS/MS	By MS/MS	By MS/MS	2.6	1.5	6	6	2	2	2	2	2	2	19.924	19.89	2;3	5.4556e-06	2235	CSM8521_2_r3	167.67	126.24	544090000	85554000	111950000	92822000	89749000	90423000	61385000			359	31	307
TPLTTGRPGATQR	Unmodified	1354.73	0.731711	31	P25588	MRC1	Mediator of replication checkpoint protein 1	yes	yes	0	0	0	1	By MS/MS	By matching	By MS/MS	By MS/MS	By MS/MS	By MS/MS	2.88	1.6	6	6	2	2	2	2	2	2	21.57	21.589	2;3	9.0548e-13	2911	CSM8521_1_r3	164.11	149.83	4329200000	105700000	382820000	2460000000	354940000	256070000	205510000			425	31	361
EIQSELASEDSK	Unmodified	1334.62	0.620155	31	P25588	MRC1	Mediator of replication checkpoint protein 1	yes	yes	0	0	0	0	By MS/MS	By MS/MS	By MS/MS	By MS/MS	By MS/MS	By MS/MS	3.2	1.66	3	3	1	1	1	1	1	1	25.264	25.288	2	1.3729e-10	3829	CSM8521_2_r2	161.63	138.98	2090800000	203960000	242420000	260860000	382110000	391230000	267350000			85	31	77
RVPLLSSYANNLK	Phospho (STY)	1553.8	0.796693	31	P25588	MRC1	Mediator of replication checkpoint protein 1	yes	yes	0	0	1	1				By MS/MS	By MS/MS	By MS/MS	4.25	0.968		3				1	1	1	35.871	35.917	2	1.0311e-38	6635	CSM8521_3_r1	160.15	106.58	33140000	0	0	0	6692300	5487700	3136300			350	31	298
EDGLVNETSQALK	Unmodified	1402.69	0.693988	31	P25588	MRC1	Mediator of replication checkpoint protein 1	yes	yes	0	0	0	0	By MS/MS	By MS/MS	By MS/MS	By MS/MS	By MS/MS	By MS/MS	3	1.68	12	10	4	4	4	3	4	3	30.235	30.187	2	2.6591e-11	5087	CSM8521_1_r1	159.79	137.26	19370000000	2230600000	2338400000	2038700000	3038100000	3846900000	1996100000			77	31	70
MDDALHALSSLTAK	Acetyl (Protein N-term);Oxidation (M)	1529.74	0.739558	31	P25588	MRC1	Mediator of replication checkpoint protein 1	yes	yes	1	1	0	0	By MS/MS	By MS/MS	By MS/MS	By MS/MS	By MS/MS	By MS/MS	3	1.63	6	6	2	2	2	2	2	2	38.891	38.932	2	2.1455e-17	7464	CSM8521_2_r2	152.64	152.64	562350000	52935000	58620000	70255000	76793000	56026000	26500000			262	31	226
HPSIIKSFASR	2 Phospho (STY)	1401.62	0.620716	31	P25588	MRC1	Mediator of replication checkpoint protein 1	yes	yes	0	0	2	1				By MS/MS	By MS/MS	By MS/MS	4.4	0.917		3				1	1	1	29.121	29.063	2	2.9566e-07	4955	CSM8521_2_r2	149.49	141.85	173830000	0	0	0	48113000	57942000	31344000			162	31	139
IQHGNDEAIEDLYTLK	Unmodified	1857.91	0.910857	31	P25588	MRC1	Mediator of replication checkpoint protein 1	yes	yes	0	0	0	0	By MS/MS	By MS/MS	By MS/MS	By MS/MS	By MS/MS	By MS/MS	2.81	1.62	8	7	2	3	3	2	3	2	32.625	32.623	2;3	4.4683e-21	5890	CSM8521_2_r3	149.23	141.34	2929800000	127580000	251340000	874280000	466420000	491470000	185690000			196	31	167
DESVLPISQLSK	Unmodified	1314.7	0.703096	31	P25588	MRC1	Mediator of replication checkpoint protein 1	yes	yes	0	0	0	0	By MS/MS	By MS/MS	By MS/MS	By MS/MS	By MS/MS	By MS/MS	2.4	1.43	9	8	5	3	1	2	3	3	36.452	36.49	2	5.0405e-10	6716	CSM8521_2_r3	148.91	141.81	7564200000	1065100000	1216900000	1168300000	1460400000	1544000000	1011600000			45	31	42
EKADESLPKR	Unmodified	1171.62	0.619701	31	P25588	MRC1	Mediator of replication checkpoint protein 1	yes	yes	0	0	0	2		By matching	By MS/MS			By MS/MS	1.67	0.943	2	1		1	1			1	20.202	20.188	2	3.6999e-06	2470	CSM8521_1_r3	147.51	113.26	12777000	0	1270300	10778000	0	0	728290			95	31	82
QNSSIKSFTNSQTDSTTSK	2 Phospho (STY)	2219.9	0.898467	31	P25588	MRC1	Mediator of replication checkpoint protein 1	yes	yes	0	0	2	1	By MS/MS	By MS/MS	By MS/MS	By MS/MS	By MS/MS	By MS/MS	2.69	1.07	6	18	2	2	2	6	7	5	27.185	27.184	2;3	3.4905e-25	4556	CSM8521_2_r2	145.91	145.91	486890000	16423000	19568000	22567000	154300000	190660000	56183000			328	31	280
PVQNDDELHENK	Unmodified	1436.65	0.653186	31	P25588	MRC1	Mediator of replication checkpoint protein 1	yes	yes	0	0	0	0	By MS/MS	By MS/MS	By MS/MS	By MS/MS	By MS/MS	By MS/MS	3	1.73	6	4	2	2	2	1	1	2	20.686	20.653	2;3	8.8987e-10	2483	CSM8521_2_r3	144.47	119.95	1217700000	149250000	214490000	198260000	131840000	135760000	333110000			313	31	266
IDSSGATSQTQPIK	Phospho (STY)	1511.69	0.686868	31	P25588	MRC1	Mediator of replication checkpoint protein 1	yes	yes	0	0	1	0	By MS/MS	By MS/MS	By MS/MS	By MS/MS	By MS/MS	By MS/MS	3.3	1.7	8	7	2	3	3	2	2	3	25.199	25.22	2	2.9761e-16	3843	CSM8521_3_r1	137.98	119.64	1241800000	41888000	44673000	63792000	101480000	126800000	80700000			174	31	148
DDVYVNEEADEAIR	Unmodified	1636.72	0.721659	31	P25588	MRC1	Mediator of replication checkpoint protein 1	yes	yes	0	0	0	0				By matching	By MS/MS	By matching	4	1		3				1	1	1	31.255	31.199	2	2.4143e-15	5502	CSM8521_3_r1	137.17	130.13	14541000	0	0	0	1595600	1835100	860130			43	31	40
SIEPQSQIITTSSNHSNALSPK	Phospho (STY)	2418.14	0.142798	31	P25588	MRC1	Mediator of replication checkpoint protein 1	yes	yes	0	0	1	0	By MS/MS	By MS/MS	By MS/MS	By MS/MS	By MS/MS	By MS/MS	3.19	1.62	6	7	2	2	2	2	3	2	30.018	29.969	2;3	2.0492e-28	5189	CSM8521_3_r3	135.72	121.85	887260000	50195000	138650000	42051000	102410000	171640000	136150000			372	31	316
VDHNVLLNTLRK	Unmodified	1420.82	0.815047	31	P25588	MRC1	Mediator of replication checkpoint protein 1	yes	yes	0	0	0	1		By MS/MS	By MS/MS				1	0	3			1	2				27.622	27.577	2;3	1.4745e-06	4894	CSM8521_1_r3	133.23	127.9	98764000	0	10776000	87988000	0	0	0			448	31	377
VDHNVLLNTLRK	Phospho (STY)	1500.78	0.781377	31	P25588	MRC1	Mediator of replication checkpoint protein 1	yes	yes	0	0	1	1			By MS/MS	By MS/MS	By MS/MS	By MS/MS	3.57	1.4	1	3			1	1	1	1	26.818	26.849	2	1.4099e-10	4244	CSM8521_3_r2	133.07	125.95	117960000	0	0	3205300	14457000	14257000	10525000			449	31	377
DESVLPISQLSK	Phospho (STY)	1394.67	0.669427	31	P25588	MRC1	Mediator of replication checkpoint protein 1	yes	yes	0	0	1	0	By MS/MS	By MS/MS	By MS/MS	By MS/MS	By MS/MS	By MS/MS	2.76	1.35	5	9	2	2	1	3	3	3	40.508	40.547	2	3.7451e-10	7747	CSM8521_2_r2	132.03	132.03	196740000	20499000	18884000	14109000	20422000	19772000	14337000			46	31	42
HIINESDSDTEVEAKPK	2 Phospho (STY)	2070.85	0.854811	31	P25588	MRC1	Mediator of replication checkpoint protein 1	yes	yes	0	0	2	1	By MS/MS	By MS/MS	By MS/MS	By MS/MS	By MS/MS	By MS/MS	3.15	1.66	8	8	2	2	4	3	2	3	25.493	25.516	2;3	1.0105e-15	3898	CSM8521_1_r1	129.05	129.05	986780000	142130000	122910000	339540000	45171000	38537000	120230000			157	31	136
TPLTTGRPGATQR	Phospho (STY)	1434.7	0.698041	31	P25588	MRC1	Mediator of replication checkpoint protein 1	yes	yes	0	0	1	1		By matching	By MS/MS	By MS/MS	By MS/MS	By MS/MS	3.5	1.66	3	3		1	2	1	1	1	22.588	22.61	2;3	3.1033e-10	3034	CSM8521_3_r1	128.68	115	338290000	0	1920800	12116000	1958600	1595300	1928100			426	31	361
HIINESDSDTEVEAKPK	Phospho (STY)	1990.89	0.888481	31	P25588	MRC1	Mediator of replication checkpoint protein 1	yes	yes	0	0	1	1	By MS/MS	By MS/MS	By MS/MS	By MS/MS	By MS/MS	By MS/MS	2.6	1.5	8	8	2	3	3	3	3	2	24.029	24.04	2;3	7.9719e-16	3442	CSM8521_2_r2	127.17	127.17	401300000	26716000	34160000	151180000	42874000	51101000	35023000			156	31	136
NTIENEVKDDVYVNEEADEAIRR	Unmodified	2720.29	0.288931	31	P25588	MRC1	Mediator of replication checkpoint protein 1	yes	yes	0	0	0	2		By MS/MS	By MS/MS				1	0	2			1	1				32.308	32.261	3	5.4903e-21	6323	CSM8521_1_r3	125.09	106.58	7658300	0	1848800	5809500	0	0	0			304	31	259
SFASRTDINDK	Phospho (STY)	1332.57	0.57111	31	P25588	MRC1	Mediator of replication checkpoint protein 1	yes	yes	0	0	1	1	By MS/MS	By MS/MS	By MS/MS	By MS/MS	By MS/MS	By MS/MS	3	1.63	3	3	1	1	1	1	1	1	25.067	25.086	2	1.7137e-06	3755	CSM8521_3_r2	124.12	124.12	488030000	114440000	119030000	207880000	8159500	7487100	3588900			361	31	308
NVSSSFTQTQR	2 Phospho (STY)	1413.53	0.532689	31	P25588	MRC1	Mediator of replication checkpoint protein 1	yes	yes	0	0	2	0				By MS/MS	By MS/MS	By MS/MS	4.76	0.65		3				1	1	1	29.164	29.11	2	9.8486e-18	5231	CSM8521_3_r1	122.7	110.47	492000000	0	0	0	11083000	9707300	7263000			309	31	262
EKEIVENLLEQEILR	Unmodified	1854.01	0.00984299	31	P25588	MRC1	Mediator of replication checkpoint protein 1	yes	yes	0	0	0	1	By matching	By MS/MS	By MS/MS	By MS/MS	By MS/MS	By MS/MS	2.8	1.66	4	3	1	1	2	1	1	1	39.197	39.24	2;3	5.2085e-13	8091	CSM8521_1_r3	121.45	117.48	43447000	1684300	6288900	22949000	2342700	2921900	2331000			97	31	84
RESDSEKEDDEIILK	Phospho (STY)	1884.84	0.835382	31	P25588	MRC1	Mediator of replication checkpoint protein 1	yes	yes	0	0	1	2	By MS/MS	By MS/MS	By MS/MS	By MS/MS	By MS/MS	By MS/MS	2.54	1.6	6	4	2	2	2	1	1	2	27.087	27.097	2;3	5.7693e-13	4729	CSM8521_1_r3	121.26	112.87	125710000	20244000	23311000	28018000	3601500	4501300	17896000			340	31	291
SFASRTDINDKFK	Phospho (STY)	1607.73	0.734487	31	P25588	MRC1	Mediator of replication checkpoint protein 1	yes	yes	0	0	1	2	By MS/MS	By MS/MS	By MS/MS				1	0	4		1	1	2				27.256	27.222	2;3	2.0027e-10	4461	CSM8521_1_r2	121.04	103.57	149150000	4373500	6862600	137920000	0	0	0			363	31	309
VDHNVLLNTLR	Phospho (STY)	1372.69	0.686414	31	P25588	MRC1	Mediator of replication checkpoint protein 1	yes	yes	0	0	1	0	By MS/MS	By MS/MS	By MS/MS	By MS/MS	By MS/MS	By MS/MS	3	1.68	6	5	2	2	2	2	2	1	30.801	30.753	2;3	2.2958e-06	5460	CSM8521_1_r2	119.45	85.276	276520000	7458700	10068000	11847000	34756000	35868000	30358000			447	31	376
EKADESLPKR	Phospho (STY)	1251.59	0.586031	31	P25588	MRC1	Mediator of replication checkpoint protein 1	yes	yes	0	0	1	2		By MS/MS	By matching				4	1.73	2			1	1				20.654	20.602	2;3	1.0452e-05	2479	CSM8521_3_r2	118.28	97.377	1399900000	0	564580	2234600	0	0	0			94	31	82
KVIISEDFVQK	Unmodified	1304.73	0.734002	31	P25588	MRC1	Mediator of replication checkpoint protein 1	yes	yes	0	0	0	1	By MS/MS	By MS/MS	By MS/MS	By MS/MS	By MS/MS	By MS/MS	3	1.63	3	3	1	1	1	1	1	1	28.506	28.457	2	1.0551e-06	5161	CSM8521_1_r3	118.04	97.301	565410000	53991000	98186000	173940000	64395000	53998000	36867000			219	31	188
TVNTIIDLEK	Phospho (STY)	1224.6	0.600284	31	P25588	MRC1	Mediator of replication checkpoint protein 1	yes	yes	0	0	1	0				By MS/MS	By MS/MS	By MS/MS	4	1		3				1	1	1	37.942	37.986	2	1.1017e-05	7190	CSM8521_2_r1	117.25	85.033	260730000	0	0	0	18520000	18667000	18192000			441	31	371
VIISEDFVQK	Unmodified	1176.64	0.639039	31	P25588	MRC1	Mediator of replication checkpoint protein 1	yes	yes	0	0	0	0	By MS/MS	By MS/MS	By MS/MS	By MS/MS	By MS/MS	By MS/MS	3.13	1.6	9	11	3	3	3	3	5	3	31.611	31.594	2	1.8183e-05	5645	CSM8521_1_r1	116.73	88.989	22551000000	2336100000	2715400000	2501000000	2487100000	3011300000	1934000000			459	31	387
SNNYEDFETDK	Unmodified	1360.54	0.541904	31	P25588	MRC1	Mediator of replication checkpoint protein 1	yes	yes	0	0	0	0	By MS/MS	By MS/MS	By MS/MS	By MS/MS	By MS/MS	By MS/MS	3	1.63	3	3	1	1	1	1	1	1	26.765	26.784	2	8.4058e-06	4622	CSM8521_1_r3	114.5	96.677	515050000	59801000	76508000	113520000	70252000	74066000	46394000			390	31	331
EMLAAENKEMDIK	Oxidation (M)	1536.72	0.71638	31	P25588	MRC1	Mediator of replication checkpoint protein 1	yes	yes	0	1	0	1	By MS/MS	By MS/MS	By MS/MS	By MS/MS	By MS/MS	By MS/MS	3.25	1.71	5	4	1	2	2	2	1	1	24.496	24.517	2;3	2.4854e-07	3826	CSM8521_1_r3	113.69	88.849	1595400000	56036000	262630000	460090000	169870000	108780000	93889000			106	31	92
SFTNSQTDSTTSK	2 Phospho (STY)	1562.55	0.553878	31	P25588	MRC1	Mediator of replication checkpoint protein 1	yes	yes	0	0	2	0	By MS/MS	By MS/MS	By MS/MS	By MS/MS	By MS/MS	By MS/MS	2	1	3	3	1	1	1	1	1	1	25.214	25.218	2	7.6575e-08	3791	CSM8521_2_r1	111.12	104.82	34607000	3721500	4624300	9080100	5248600	7865400	4067100			366	31	310
EMLAAENKEMDIK	2 Oxidation (M)	1552.71	0.711294	31	P25588	MRC1	Mediator of replication checkpoint protein 1	yes	yes	0	2	0	1		By MS/MS	By MS/MS	By MS/MS	By MS/MS	By MS/MS	3	1.48	3	5		1	2	2	2	1	22.407	22.425	2;3	5.0204e-08	2985	CSM8521_2_r2	110.84	89.839	1389200000	0	50168000	494430000	315190000	214740000	60068000			107	31	92
EKADESLPK	Unmodified	1015.52	0.51859	31	P25588	MRC1	Mediator of replication checkpoint protein 1	yes	yes	0	0	0	1	By MS/MS	By MS/MS	By matching	By MS/MS	By MS/MS	By MS/MS	2.75	1.56	3	3	1	1	1	1	1	1	21.132	21.145	2	0.0031711	2624	CSM8521_2_r1	110.79	73.234	5748400000	754430000	870770000	1024100000	985660000	1147200000	654250000			93	31	81
GLKLEDMAK	Unmodified	1003.54	0.537217	31	P25588	MRC1	Mediator of replication checkpoint protein 1	yes	yes	0	0	0	1	By MS/MS	By MS/MS	By MS/MS	By MS/MS	By MS/MS	By MS/MS	3	1.63	6	6	2	2	2	2	2	2	26.915	26.934	2;3	0.0030551	4261	CSM8521_3_r2	107.69	92.911	3130600000	224370000	250860000	529380000	212040000	224860000	181170000			144	31	125
EMLAAENK	Unmodified	904.432	0.432418	31	P25588	MRC1	Mediator of replication checkpoint protein 1	yes	yes	0	0	0	0	By MS/MS	By MS/MS	By matching	By MS/MS	By MS/MS	By MS/MS	3	1.63	3	3	1	1	1	1	1	1	22.774	22.793	2	0.010108	3073	CSM8521_1_r1	107.67	86.813	5616700000	501600000	476230000	495260000	733570000	682410000	490120000			105	31	91
RESDSEKEDDEIILK	2 Phospho (STY)	1964.8	0.801713	31	P25588	MRC1	Mediator of replication checkpoint protein 1	yes	yes	0	0	2	2	By MS/MS	By MS/MS	By MS/MS	By MS/MS	By MS/MS	By MS/MS	3.09	1.41	5	11	2	2	1	4	3	4	29.579	29.529	2;3	5.663e-09	4999	CSM8521_2_r1	106.19	74.184	1568700000	186290000	345550000	114350000	279590000	181950000	121550000			341	31	291
EMLAAENK	Oxidation (M)	920.427	0.427332	31	P25588	MRC1	Mediator of replication checkpoint protein 1	yes	yes	0	1	0	0	By MS/MS	By MS/MS	By MS/MS	By MS/MS	By MS/MS	By MS/MS	3	1.63	3	3	1	1	1	1	1	1	20.425	20.388	2	0.00095052	2387	CSM8521_2_r3	104.21	73.54	2343900000	243020000	193460000	201820000	389560000	335440000	294940000			104	31	91
TDINDKFK	Unmodified	979.497	0.497461	31	P25588	MRC1	Mediator of replication checkpoint protein 1	yes	yes	0	0	0	1	By MS/MS	By MS/MS	By MS/MS	By MS/MS	By MS/MS	By MS/MS	3	1.63	3	3	1	1	1	1	1	1	22.665	22.683	2	0.012286	3116	CSM8521_1_r1	104.21	64.546	5355400000	429070000	675510000	590360000	598120000	542910000	399550000			413	31	350
TVNTIIDLEK	Unmodified	1144.63	0.633954	31	P25588	MRC1	Mediator of replication checkpoint protein 1	yes	yes	0	0	0	0	By MS/MS	By MS/MS	By MS/MS	By MS/MS	By MS/MS	By MS/MS	3.06	1.33	7	19	2	3	2	7	5	7	32.679	32.655	2	5.7194e-11	5969	CSM8521_2_r1	104.05	32.547	10667000000	1485000000	1297400000	1440500000	1263000000	2188900000	1388100000			440	31	371
ADESLPKR	Unmodified	914.482	0.482145	31	P25588	MRC1	Mediator of replication checkpoint protein 1	yes	yes	0	0	0	1	By MS/MS	By MS/MS	By MS/MS	By MS/MS	By MS/MS	By MS/MS	3	1.63	3	3	1	1	1	1	1	1	20.475	20.438	2	0.0025375	2453	CSM8521_3_r3	100.19	37.474	55691000	6620300	5575500	8459400	5543500	6748500	4426100			3	31	3
ESDSEKEDDEIILK	Phospho (STY)	1728.73	0.734271	31	P25588	MRC1	Mediator of replication checkpoint protein 1	yes	yes	0	0	1	1	By MS/MS	By MS/MS	By MS/MS	By MS/MS	By MS/MS	By MS/MS	3	1.63	3	3	1	1	1	1	1	1	30.284	30.236	2	4.1047e-07	5207	CSM8521_2_r1	99.941	72.08	123350000	10649000	10139000	21760000	16771000	15031000	9664500			112	31	96
VPLLSSYANNLKR	Phospho (STY)	1553.8	0.796693	31	P25588	MRC1	Mediator of replication checkpoint protein 1	yes	yes	0	0	1	1				By MS/MS	By MS/MS	By MS/MS	4.25	0.968		3				1	1	1	34.385	34.327	2;3	2.3651e-07	6295	CSM8521_3_r3	98.156	71.187	70710000	0	0	0	4855000	3705400	2379700			469	31	394
SYKTVGSSK	Phospho (STY)	1035.46	0.463791	31	P25588	MRC1	Mediator of replication checkpoint protein 1	yes	yes	0	0	1	1	By MS/MS	By MS/MS	By matching	By matching	By MS/MS	By MS/MS	2	1	3	3	1	1	1	1	1	1	20.076	20.047	2	0.00071553	2295	CSM8521_2_r3	98.048	71.086	22282000	2842700	1462800	1834500	5832300	6584500	3725200			410	31	347
HPSIIKSFASR	Phospho (STY)	1321.65	0.654386	31	P25588	MRC1	Mediator of replication checkpoint protein 1	yes	yes	0	0	1	1		By MS/MS	By MS/MS				1	0	2			1	1				26.888	26.845	2	0.00013837	4659	CSM8521_1_r3	97.911	87.68	8115100	0	0	8115100	0	0	0			161	31	139
TVGSSKASITYMGK	Phospho (STY)	1508.69	0.694596	31	P25588	MRC1	Mediator of replication checkpoint protein 1	yes	yes	0	0	1	1	By matching	By MS/MS	By matching	By MS/MS	By MS/MS	By MS/MS	3	1.63	3	3	1	1	1	1	1	1	27.133	27.152	2	6.812e-07	4336	CSM8521_3_r3	97.69	74.464	106230000	2196500	1737600	2392700	2280400	1900200	1468700			434	31	368
MIDDYSK	Oxidation (M)	886.374	0.374234	31	P25588	MRC1	Mediator of replication checkpoint protein 1	yes	yes	0	1	0	0	By MS/MS	By MS/MS	By MS/MS	By MS/MS	By MS/MS	By MS/MS	3	1.63	3	3	1	1	1	1	1	1	21.698	21.717	2	0.0037998	2796	CSM8521_1_r1	97.473	97.473	2790600000	361250000	352980000	371540000	526910000	621730000	388260000			267	31	229
SIEPQSQIITTSSNHSNALSPK	Unmodified	2338.18	0.176467	31	P25588	MRC1	Mediator of replication checkpoint protein 1	yes	yes	0	0	0	0	By matching	By MS/MS	By MS/MS	By MS/MS	By MS/MS	By MS/MS	2.83	1.52	4	5	1	2	1	2	2	1	28.19	28.139	2;3	5.0476e-21	4710	CSM8521_1_r2	95.957	95.957	2496300000	3933600	275490000	1981900000	132480000	18437000	9121700			373	31	316
VDHNVLLNTLR	Unmodified	1292.72	0.720084	31	P25588	MRC1	Mediator of replication checkpoint protein 1	yes	yes	0	0	0	0	By MS/MS	By MS/MS	By MS/MS	By MS/MS	By MS/MS	By MS/MS	2.95	1.7	15	11	4	5	6	4	3	4	30.792	30.751	2;3	4.156e-07	5391	CSM8521_3_r1	95.311	64.237	12184000000	695910000	1649200000	4811700000	1041700000	1361400000	6600900			446	31	376
VFNVPIHSVNDGK	Unmodified	1424.74	0.741213	31	P25588	MRC1	Mediator of replication checkpoint protein 1	yes	yes	0	0	0	0	By matching	By MS/MS	By MS/MS	By MS/MS	By MS/MS	By matching	2.09	0.996	5	6	1	2	2	2	2	2	28.52	28.47	2;3	8.4933e-05	5182	CSM8521_1_r3	94.692	81.238	83307000	892960	8554900	53575000	8015200	6752600	5516600			453	31	381
GLKLEDMAK	Oxidation (M)	1019.53	0.532132	31	P25588	MRC1	Mediator of replication checkpoint protein 1	yes	yes	0	1	0	1	By MS/MS	By MS/MS	By MS/MS	By MS/MS	By MS/MS	By matching	3	1.63	3	3	1	1	1	1	1	1	23.025	23.044	2	0.0041609	3386	CSM8521_1_r3	93.429	59.69	2008400000	101460000	138140000	205730000	135940000	141990000	108050000			143	31	125
RRLEIGDDAK	Unmodified	1171.63	0.630934	31	P25588	MRC1	Mediator of replication checkpoint protein 1	yes	yes	0	0	0	2	By matching	By matching	By MS/MS	By MS/MS	By MS/MS	By MS/MS	3	1.63	3	3	1	1	1	1	1	1	22.163	22.181	2;3	0.0010872	2926	CSM8521_3_r3	92.838	67.264	119990000	5369100	15520000	64544000	2686800	5147900	4862700			348	31	297
GPDTQMDVPPQTAHDEDK	Oxidation (M)	1995.85	0.847999	31	P25588	MRC1	Mediator of replication checkpoint protein 1	yes	yes	0	1	0	0	By matching		By MS/MS				1	0	3		1		2				21.301	21.272	2;3	3.8886e-08	2895	CSM8521_1_r3	91.518	84.301	32432000	406880	0	32025000	0	0	0			149	31	129
NTIENEVK	Unmodified	945.477	0.476725	31	P25588	MRC1	Mediator of replication checkpoint protein 1	yes	yes	0	0	0	0	By MS/MS	By MS/MS	By matching	By MS/MS	By MS/MS	By matching	3	1.63	3	3	1	1	1	1	1	1	23.335	23.354	2	0.013958	3267	CSM8521_3_r2	89.142	25.836	334270000	46056000	36391000	42913000	71523000	65263000	56929000			301	31	257
RQLIDKEK	Unmodified	1028.6	0.597843	31	P25588	MRC1	Mediator of replication checkpoint protein 1	yes	yes	0	0	0	2	By matching	By MS/MS	By MS/MS	By MS/MS	By MS/MS	By MS/MS	3	1.63	3	3	1	1	1	1	1	1	20.111	20.074	3	0.0015587	2339	CSM8521_3_r1	85.666	71.025	121130000	2878000	9201200	39222000	9366500	8934600	6802400			347	31	296
QNSSIKSFTNSQTDSTTSK	3 Phospho (STY)	2299.86	0.864797	31	P25588	MRC1	Mediator of replication checkpoint protein 1	yes	yes	0	0	3	1				By MS/MS	By matching	By MS/MS	3	0		11				4	3	4	30.719	30.671	2	2.8783e-08	5490	CSM8521_2_r1	85.087	74.181	45925000	0	0	0	17640000	11992000	16292000			329	31	280
KQILDHQK	Unmodified	1008.57	0.571629	31	P25588	MRC1	Mediator of replication checkpoint protein 1	yes	yes	0	0	0	1	By MS/MS	By MS/MS	By MS/MS	By MS/MS	By MS/MS	By MS/MS	3	1.68	6	5	2	2	2	1	2	2	19.705	19.668	2;3	0.0014209	2210	CSM8521_3_r3	81.191	73.623	3590000000	147600000	349870000	1427400000	125360000	320870000	227020000			217	31	186
TQIDTVAQTLQDEVPHTLK	Unmodified	2136.11	0.106263	31	P25588	MRC1	Mediator of replication checkpoint protein 1	yes	yes	0	0	0	0		By MS/MS	By MS/MS	By MS/MS		By matching	1.67	0.943	4	2		2	2	1		1	36.434	36.488	2;3	3.2209e-12	7474	CSM8521_1_r3	78.674	78.674	63052000	0	14262000	47068000	843110	0	877790			428	31	363
IAINLGHYGDNIGEDTDK	Unmodified	1943.92	0.922485	31	P25588	MRC1	Mediator of replication checkpoint protein 1	yes	yes	0	0	0	0	By matching	By MS/MS	By MS/MS	By MS/MS	By MS/MS	By MS/MS	2	1	3	3	1	1	1	1	1	1	31.924	31.912	3	1.1434e-05	5663	CSM8521_2_r1	73.464	67.197	70822000	3361400	6263300	18901000	15023000	18611000	8661500			164	31	140
NNFNPHEIR	Unmodified	1139.55	0.547205	31	P25588	MRC1	Mediator of replication checkpoint protein 1	yes	yes	0	0	0	0	By MS/MS	By MS/MS	By MS/MS	By MS/MS	By MS/MS	By MS/MS	2.43	1.4	9	9	3	2	4	3	3	3	23.526	23.539	2;3	4.6338e-06	4059	CSM8521_1_r3	73.248	59.473	7834900000	405210000	842150000	3054000000	1129100000	1255600000	902960000			297	31	253
NTIENEVKDDVYVNEEADEAIR	Unmodified	2564.19	0.18782	31	P25588	MRC1	Mediator of replication checkpoint protein 1	yes	yes	0	0	0	1			By MS/MS				1	0	1				1				34.041	33.997	3	1.1938e-06	6811	CSM8521_1_r3	71.535	66.482	3650800	0	0	3650800	0	0	0			303	31	258
VFNVPIHSVNDGKPTQLIK	Unmodified	2105.16	0.163324	31	P25588	MRC1	Mediator of replication checkpoint protein 1	yes	yes	0	0	0	1		By matching	By MS/MS				1	0	2			1	1				30.686	30.639	3	1.1089e-05	5847	CSM8521_1_r3	68.567	65.329	37407000	0	16528000	20878000	0	0	0			454	31	382
LENAHPKPVQNDDELHENK	Unmodified	2226.07	0.066523	31	P25588	MRC1	Mediator of replication checkpoint protein 1	yes	yes	0	0	0	1		By matching	By MS/MS				1	0	2			1	1				21.324	21.277	3	1.2178e-05	2833	CSM8521_1_r3	67.43	57.642	16174000	0	2253500	13921000	0	0	0			228	31	196
VPLLSSYANNLK	Phospho (STY)	1397.7	0.695582	31	P25588	MRC1	Mediator of replication checkpoint protein 1	yes	yes	0	0	1	0				By matching	By MS/MS	By MS/MS	4	1		3				1	1	1	39.417	39.461	2	0.0015044	7447	CSM8521_2_r3	67.169	54.933	54630000	0	0	0	8850700	6741400	3831700			467	31	393
TDINDKFK	Phospho (STY)	1059.46	0.463791	31	P25588	MRC1	Mediator of replication checkpoint protein 1	yes	yes	0	0	1	1				By matching	By MS/MS	By MS/MS	4	1		3				1	1	1	24.401	24.445	2	0.013079	3568	CSM8521_3_r1	65.305	35.832	18558000	0	0	0	3285300	3480600	2461900			414	31	350
ASITYMGK	Oxidation (M)	885.427	0.426604	31	P25588	MRC1	Mediator of replication checkpoint protein 1	yes	yes	0	1	0	0	By MS/MS	By MS/MS	By MS/MS	By MS/MS	By MS/MS	By MS/MS	3	1.59	6	7	2	2	2	2	3	2	22.786	22.804	2	0.0046033	3299	CSM8521_1_r3	63.306	54.977	6272500000	496910000	613670000	594000000	1007300000	1056200000	663470000			20	31	19
ESDSEKEDDEIILK	2 Phospho (STY)	1808.7	0.700602	31	P25588	MRC1	Mediator of replication checkpoint protein 1	yes	yes	0	0	2	1	By MS/MS	By MS/MS	By matching	By MS/MS	By MS/MS	By MS/MS	2.57	1.55	6	5	1	3	2	1	2	2	34.663	34.608	2	0.00011752	6528	CSM8521_1_r2	60.518	34.4	52476000	4599300	7897700	5292100	7611400	10898000	7093900			113	31	96
KAPEQNHNNGK	Unmodified	1235.6	0.600697	31	P25588	MRC1	Mediator of replication checkpoint protein 1	yes	yes	0	0	0	1	By matching	By matching	By MS/MS				1	0	3		1	1	1				15.75	15.718	3	0.0021205	1290	CSM8521_1_r3	60.434	51.704	15176000	1421300	1759500	11995000	0	0	0			212	31	181
DDVYVNEEADEAIRR	Unmodified	1792.82	0.82277	31	P25588	MRC1	Mediator of replication checkpoint protein 1	yes	yes	0	0	0	1	By MS/MS	By matching	By matching	By MS/MS	By matching		2.71	1.67	3	2	1	1	1	1	1		28.548	28.499	2	0.0011309	4748	CSM8521_3_r1	58.37	44.212	15025000	1046600	1661600	3628900	2405900	2555900	0			44	31	41
MDDALHALSSLTAK	Acetyl (Protein N-term);Oxidation (M);Phospho (STY)	1609.71	0.705889	31	P25588	MRC1	Mediator of replication checkpoint protein 1	yes	yes	1	1	1	0				By MS/MS	By MS/MS	By matching	4.25	0.968		3				1	1	1	42.188	42.23	2	0.0020947	8142	CSM8521_2_r2	58.268	45.177	13842000	0	0	0	3888400	2999700	837230			264	31	226
MDDALHALSSLTAK	Acetyl (Protein N-term)	1513.74	0.744644	31	P25588	MRC1	Mediator of replication checkpoint protein 1	yes	yes	1	0	0	0		By matching	By MS/MS	By MS/MS		By matching	2.6	1.5	2	2		1	1	1		1	44.752	44.809	2	0.0011738	9376	CSM8521_1_r3	56.043	48.764	3954100	0	793220	1009600	787180	0	547450			263	31	226
TVGSSKASITYMGK	Oxidation (M);Phospho (STY)	1524.69	0.68951	31	P25588	MRC1	Mediator of replication checkpoint protein 1	yes	yes	0	1	1	1	By MS/MS						4	1.73	1		1						24.56	24.596	2	0.0011954	3593	CSM8521_3_r3	56.043	39.469	77576000	1003400	0	0	0	0	0			433	31	368
LEIGDDAK	Unmodified	859.429	0.428712	31	P25588	MRC1	Mediator of replication checkpoint protein 1	yes	yes	0	0	0	0	By MS/MS	By MS/MS	By MS/MS	By MS/MS	By MS/MS	By MS/MS	3	1.48	3	5	1	1	1	1	2	2	24.816	24.834	2	0.0045391	3853	CSM8521_2_r2	53.554	8.8622	4794500000	358310000	372460000	411140000	679230000	631570000	451290000			227	31	195
RVPLLSSYANNLKR	Phospho (STY)	1709.9	0.897804	31	P25588	MRC1	Mediator of replication checkpoint protein 1	yes	yes	0	0	1	2				By MS/MS	By MS/MS	By MS/MS	3.8	0.98		3				1	1	1	32.254	32.263	3	0.0013157	5776	CSM8521_3_r1	53.448	50.538	15677000	0	0	0	0	4730400	2433200			351	31	299
EIQSELASEDSK	Phospho (STY)	1414.59	0.586485	31	P25588	MRC1	Mediator of replication checkpoint protein 1	yes	yes	0	0	1	0				By MS/MS	By matching	By matching	4	1		3				1	1	1	30.684	30.627	2	0.0046287	5356	CSM8521_3_r2	53.252	41.762	7321900	0	0	0	1069200	1026700	1080500			86	31	77
TQAIGIPQATHQEQK	Unmodified	1648.85	0.853283	31	P25588	MRC1	Mediator of replication checkpoint protein 1	yes	yes	0	0	0	0	By MS/MS	By MS/MS	By MS/MS	By MS/MS	By MS/MS	By MS/MS	1.91	0.996	6	5	2	2	2	2	1	2	24.681	24.685	2;3	0.0012483	4010	CSM8521_1_r3	49.988	45.672	631270000	24492000	59421000	374410000	78460000	19494000	74993000			427	31	362
HPSIIKSFASR	3 Phospho (STY)	1481.59	0.587047	31	P25588	MRC1	Mediator of replication checkpoint protein 1	yes	yes	0	0	3	1				By MS/MS			3	0		1				1			31.412	31.472	2	0.0056378	5541	CSM8521_2_r1	45.79	38.588	0	0	0	0	0	0	0			163	31	139
HIINESDSDTEVEAKPK	Unmodified	1910.92	0.92215	31	P25588	MRC1	Mediator of replication checkpoint protein 1	yes	yes	0	0	0	1			By MS/MS				1	0	1				1				23.038	22.994	3	0.0018471	3409	CSM8521_1_r3	45.14	43.069	4142300	0	0	4142300	0	0	0			158	31	136
[truncated: 6 more columns]
